# Supplementary material for: A short carboxyl-terminal tail is required for single-stranded DNA binding, higher-order structural organization, and stability of the mitochondrial single-stranded annealing protein Mgm101
Source: PubMed Central journal article supplement — Mol Biol Cell. 2013 May 15;24(10):1507–18. doi: 10.1091/mbc.E13-01-0006 (PMC3655812; doi:10.1091/mbc.e13-01-0006), 2013-05-15
Supplement: supp_E13-01-0006v1_CombinedSupMats.pdf [file supp_E13-01-0006v1_CombinedSupMats.pdf]

**Supplemental Table 1. Oligonucleotides used in the site-directed *in vitro* mutagenesis for generating the mutant *mgm101* alleles.**

| Alleles                   | Name            | Sequence                                                         |
|---------------------------|-----------------|------------------------------------------------------------------|
| Y139A:                    | Mgm101Y139A-P1  | 5'-cca gat ggt ttg ata <u>GCC</u> ttg cct gaa att aaa-3'         |
|                           | Mgm101Y139A-P2  | 5'-ttt aat ttc agg caa <u>GGC</u> tat caa acc atc tgg-3'         |
| F244A:                    | Mgm101F244A-P1  | 5'-cat tgt act gag aag <u>GCT</u> gtg gaa cat gtt acc-3'         |
|                           | Mgm101F244A-P2  | 5'-ggg aac atg ttc cac <u>AGC</u> ctt ctc agt aca atg-3'         |
| K251A:                    | Mgm101K251A-P1  | 5'-gaa cat gtt acc acc <u>GCG</u> aga aag aag aaa att-3'         |
|                           | Mgm101K251A-P2  | 5'-aat ttt ctt ctt tct <u>CGC</u> ggt ggt aac atg ttc-3'         |
| R252A:                    | Mgm101R252A-P1  | 5'-cat gtt acc acc aag <u>GCA</u> aag aag aaa att tgg-3'         |
|                           | Mgm101R252A-P2  | 5'-cca aat ttt ctt ctt <u>TGC</u> ctt ggt ggt aac atg-3'         |
| K253A:                    | Mgm101K253A-P1  | 5'-gtt acc acc aag aga <u>GCG</u> aag aaa att tgg tta-3'         |
|                           | Mgm101K253A-P2  | 5'-taa cca aat ttt ctt <u>CGC</u> tct ctt ggt ggt aac-3'         |
| W257A:                    | Mgm101W257A-P1  | 5'-aga aag aag aaa att <u>GCG</u> tta aga aag gac aga-3'         |
|                           | Mgm101W257A-P2  | 5'-tct gtc ctt tet taa <u>CGC</u> aat ttt ctt ctt tct-3'         |
| R259A:                    | Mgm101R259A -P1 | 5'-aag aaa att tgg tta <u>GCA</u> aag gac aga caa gtt-3'         |
|                           | Mgm101R259A-P2  | 5'-aac ttg tet gtc ctt <u>TGC</u> taa cca aat ttt ctt-3'         |
| K260A:                    | Mgm101K260A-P1  | 5'-aaa att tgg tta aga <u>GCG</u> gac aga caa gtt gaa-3'         |
|                           | Mgm101 K260A-P2 | 5'-ttc aac ttg tet gtc <u>CGC</u> tct taa cca aat ttt-3'         |
| Y266A:                    | Mgm101Y266A-P1  | 5'gac aga caa gtt gaa <u>GCT</u> cct tat aaa tag tca 3'          |
|                           | Mgm101Y266A-P2  | 5'-tga cta ttt ata agg <u>AGC</u> ttc aac ttg tet gtc-3'         |
| Y268A:                    | Mgm101Y268A -P1 | 5'-caa gtt gaa tat cct <u>GCT</u> aaa tag tca ata tgc-3'         |
|                           | Mgm101Y268A -P2 | 5'-gca tat tga cta ttt <u>AGC</u> agg ata ttc aac ttg-3'         |
| K269A:                    | Mgm101K269A -P1 | 5'-gtt gaa tat cct tat <u>GCA</u> tag tca ata tgc gaa-3'         |
|                           | Mgm101K269A -P2 | 5'-ttc gca tat tga cta <u>TGC</u> ata agg ata ttc aac-3'         |
| K251A/<br>R252A/<br>K253A | Mgm101K25123-P1 | 5'-gaa cat gtt acc acc <u>GCG GCA GCG</u> aag aaa att tgg tta-3' |
|                           | Mgm101K25123-P2 | 5'-taa cca aat ttt ctt <u>CGC TGC CGC</u> ggt ggt aac atg ttc-3' |
